# Supplementary material for: Synthesis of gold nanorod/neodymium oxide yolk/shell composite with plasmon-enhanced near-infrared luminescence
Source: Royal Society of Chemistry journal article supplement (doi:10.1039/c8ra01342j), 2018-01-01
Supplement: c8ra01342j1.pdf [file c8ra01342j1.pdf]

## **Electronic Supplementary Information (ESI)**

### **Synthesis of gold nanorod/neodymium oxide yolk/shell composite with plasmon enhanced near-infrared luminescence**

Yafang Zhang,<sup>\*a,b</sup> Jiahong Wang,<sup>\*b,c,d</sup> Fan Nan<sup>b,e</sup> and Qu-Quan Wang<sup>\*b</sup>

<sup>a</sup>School of Physics and Technology, University of Jinan, Jinan, 250022, P. R. China.

E-mail: yfzhang\_opt@126.com

<sup>b</sup>School of Physics and Technology, Wuhan University, Wuhan, 430072, P. R. China.

E-mail: qqwang@whu.edu.cn

<sup>c</sup>Shenzhen Institutes of Advanced Technology, Chinese Academy of Sciences, Shenzhen 518055, P. R. China

E-mail: jh.wang1@siat.ac.cn

<sup>d</sup>Department of Physics, City University of Hong Kong, Kowloon, Hong Kong, P. R. China

<sup>e</sup>Department of Chemical and Biomolecular Engineering, Clarkson University, Potsdam, NY 13699, United States.

## 1. Experimental Section

*Preparation of AuNR@Nd<sub>2</sub>O<sub>3</sub> yolk/shell nanocomposites:* The AuNRs were firstly synthesized using a seed-mediated growth method.<sup>1</sup> The freshly prepared AuNRs solution was centrifuged at 10,000 rpm for 10 min and resuspended in defined volume of ultrapure water. Fig. ESI-1a shows the TEM images of AuNRs. The surfactant was exchanged from CTAB to oleate according to the method described previously<sup>1</sup>. For the synthesis of AuNR@Nd<sub>2</sub>O<sub>3</sub> core/shell composite, 5 mL of oleate-coated AuNRs aqueous solution was added to 14 mL of ultrapure water, followed by injection of Nd(NO<sub>3</sub>)<sub>3</sub> (0.01 M, 0.5 mL) and HMT (0.2 M, 0.5 mL) aqueous solution. The resulting mixture was gently stirred till a well-dispersed solution was achieved. After incubated in an oven at 85°C for 3 h, the solution was centrifuged at 8,000 rpm for 8 min and resuspended in 5 mL of ultrapure water. The above steps were repeated for three times, the final AuNR@Nd<sub>2</sub>O<sub>3</sub> yolk/shell nanocomposites were obtained as shown in Fig. ESI-1b.

*Preparation of Nd<sub>2</sub>O<sub>3</sub> hollow nanoparticles:* The Nd<sub>2</sub>O<sub>3</sub> hollow nanoparticles were prepared by using a electrolyte etching method.<sup>2,3</sup> In detail, 1,2-DMPII and I<sub>2</sub> were first dissolved in the mixing solution of acetonitrile/ butyl cyanide [85/15, v:v]. Then, 1 mL of 1.2 M 1,2-DMPII solution, 1 mL of 0.1 M I<sub>2</sub> aqueous solution and 40 μL of LiI aqueous solution are mixed together. An appropriate amount of the electrolyte solution was injected into 5 mL of the AuNR@Nd<sub>2</sub>O<sub>3</sub> yolk/shell composite aqueous solution. The mixture was sonicated for different time to achieve composite contain various length AuNR. After 4 h etching, the AuNRs totally disappeared and the hollow Nd<sub>2</sub>O<sub>3</sub> HNPs were obtained as Fig. ESI-1c shows.

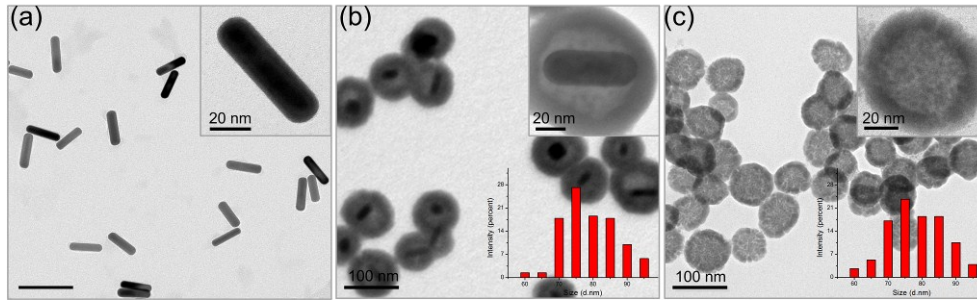

Fig. ESI-1 Low magnification and single particle TEM images of original AuNRs (a), AuNR@Nd<sub>2</sub>O<sub>3</sub> yolk/shell nanocomposites (b) and Nd<sub>2</sub>O<sub>3</sub> hollow nanoparticles (c). The insets in (b) and (c) are size distribution of AuNR@Nd<sub>2</sub>O<sub>3</sub> yolk/shell and Nd<sub>2</sub>O<sub>3</sub> hollow nanoparticles.

## 2. Characterization

Extinction spectra were recorded on TU-1810UV-Vis-NIR spectrophotometer (Purkinje General Instrument Co. Ltd Beijing, China). Transmission electron microscopy (TEM) images were obtained on a JEOL 2100F transmission electron microscope at an accelerating voltage of 200 kV. The excitation source for the fluorescence spectra was a Ti:Sapphire laser (Mira 900, Coherent) at 730 nm. An 830 nm cut filter was used to filter the exciting noise and a tunable neutral density filter was used to adjust the excitation intensity, respectively. The near-infrared luminescence spectra were recorded by a spectrometer (Spectrapro 2500i, Acton) with liquid nitrogen cooled CCD (SPEC-10:100B, Princeton)

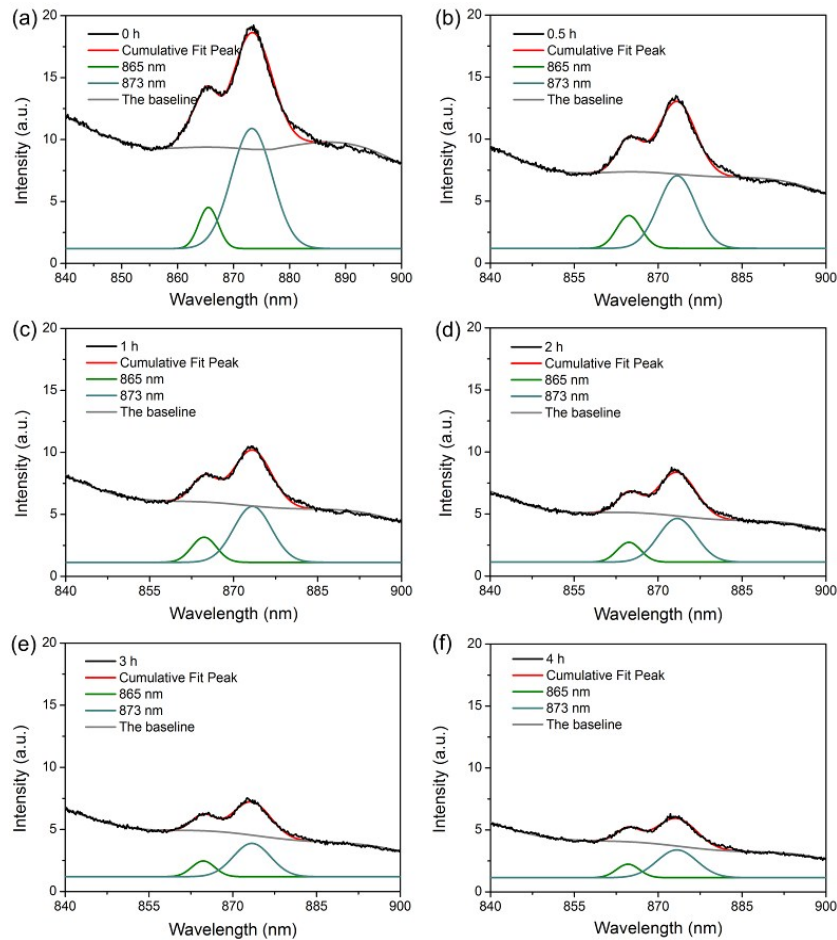

Fig. ESI-2 Emission spectra of composites after etching for 0 h (a), 0.5 h (b), 1.0 h (c), 2.0 h (d), 3.0 h (e) and 4.0 h (f). The spectra are fitted into Gaussian lines. The green and the blue lines present the emission bands at 865 nm and 873 nm of  $\text{Nd}^{3+}$ . The gray lines present the baseline.

## References

- [1] Y. Zhang, D. Yang, J. Wang, Y. Wang, S. Ding, L. Zhou, Z. Hao and Q. Wang, *Nanoscale*, 2015, **7**, 8503-8509.
- [2] Q. Xu, F. Liu, W. Meng and Y. Huang, *Opt. Express*, 2012, **20**, 898-907.
- [3] C. Fang, H. Jia, S. Chang, Q. Ruan, P. Wang, T. Chen and J. Wang, *Energy Environ. Sci.*, 2014, **7**, 3431-3438.
